# Supplementary material for: Potential Cross-Reactive Immunity to SARS-CoV-2 From Common Human Pathogens and Vaccines
Source: PubMed Central journal article supplement (PMC7596387; doi:10.3389/fimmu.2020.586984), 2020-10-16
Supplement: Table_1.pdf [file Table_1.pdf]

**Table S1.** COVID-19 cases and fatalities per million in different countries with regard to the use of aP/wP vaccines

| Countries                                                  | wP                     |                        | aP                    |                        |
|------------------------------------------------------------|------------------------|------------------------|-----------------------|------------------------|
|                                                            | Cases/ 10 <sup>6</sup> | Death/ 10 <sup>6</sup> | Cases 10 <sup>6</sup> | Death/ 10 <sup>6</sup> |
| Albania                                                    | 365                    | 11                     |                       |                        |
| Andorra                                                    |                        |                        | 9.877                 | 660                    |
| Armenia                                                    | 2.624                  | 33                     |                       |                        |
| Austria                                                    |                        |                        | 1.843                 | 72                     |
| Azerbaijan                                                 | 451                    | 5                      |                       |                        |
| Belarus                                                    | 4.122                  | 23                     |                       |                        |
| Belgium                                                    |                        |                        | 4.971                 | 808                    |
| Bosnia and Herzegovina                                     |                        |                        | 742                   | 46                     |
| Bulgaria                                                   |                        |                        | 354                   | 19                     |
| Croatia                                                    |                        |                        | 546                   | 25                     |
| Cyprus                                                     |                        |                        | 778                   | 14                     |
| Czech Republic                                             |                        |                        | 845                   | 30                     |
| Denmark                                                    |                        |                        | 1.983                 | 98                     |
| Estonia                                                    |                        |                        | 1.387                 | 50                     |
| Finland                                                    |                        |                        | 1.208                 | 56                     |
| France                                                     |                        |                        | 2.8                   | 437                    |
| Georgia                                                    | 184                    | 3                      |                       |                        |
| Germany                                                    |                        |                        | 2.167                 | 101                    |
| Greece                                                     |                        |                        | 277                   | 17                     |
| Hungary                                                    |                        |                        | 393                   | 52                     |
| Iceland                                                    |                        |                        | 5.293                 | 29                     |
| Ireland                                                    |                        |                        | 5.015                 | 327                    |
| Israel                                                     |                        |                        | 1.823                 | 31                     |
| Italy                                                      |                        |                        | 3.813                 | 545                    |
| Kazakhstan                                                 | 496                    | 2                      |                       |                        |
| Kyrgyzstan                                                 | 233                    | 2                      |                       |                        |
| Latvia                                                     |                        |                        | 560                   | 12                     |
| Lithuania                                                  |                        |                        | 604                   | 24                     |
| Luxembourg                                                 |                        |                        | 6.393                 | 176                    |
| Malta                                                      |                        |                        | 1.386                 | 16                     |
| Monaco                                                     |                        |                        | 2.499                 | 102                    |
| Montenegro                                                 |                        |                        | 516                   | 14                     |
| Netherlands (the)                                          |                        |                        | 2.672                 | 343                    |
| North Macedonia                                            |                        |                        | 979                   | 57                     |
| Norway                                                     |                        |                        | 1.549                 | 43                     |
| Poland                                                     | 589                    | 27                     |                       |                        |
| Portugal                                                   |                        |                        | 3.068                 | 133                    |
| Republic of Moldova (the)                                  | 1.868                  | 68                     |                       |                        |
| Romania                                                    |                        |                        | 966                   | 64                     |
| Russian Federation (the)                                   | 2.54                   | 27                     |                       |                        |
| San Marino                                                 |                        |                        | 19.662                | 1.238                  |
| Serbia                                                     |                        |                        | 1.29                  | 27                     |
| Slovakia                                                   |                        |                        | 278                   | 5                      |
| Slovenia                                                   |                        |                        | 708                   | 52                     |
| Spain                                                      |                        |                        | 6.06                  | 580                    |
| Sweden                                                     |                        |                        | 3.476                 | 418                    |
| Switzerland                                                |                        |                        | 3.559                 | 222                    |
| Tajikistan                                                 | 360                    | 5                      |                       |                        |
| Turkey                                                     |                        |                        | 1.884                 | 52                     |
| Ukraine                                                    | 501                    | 15                     | 501                   | 15                     |
| United Kingdom of Great Britain and Northern Ireland (the) |                        |                        | 3.909                 | 546                    |
| Uzbekistan                                                 | 100                    | 0.4                    |                       |                        |

Data collected from <https://www.worldometers.info/coronavirus/> on May 27th 2020.  
wP/aP vaccination obtained from [https://apps.who.int/immunization\\_monitoring/](https://apps.who.int/immunization_monitoring/)
